## CORRECTION

## Correction: ChatGPT versus human in generating medical graduate exam multiple choice questions—A multinational prospective study (Hong Kong S.A.R., Singapore, Ireland, and the United Kingdom)

Billy Ho Hung Cheung, Gary Kui Kai Lau, Gordon Tin Chun Wong, Elaine Yuen Phin Lee, Dhananjay Kulkarni, Choon Sheong Seow, Ruby Wong, Michael Tiong-Hong Co

The Funding statement for this article is incorrect. The correct Funding statement is as follows: This publication was made possible in part by the support from the HKU Libraries Open Access Author Fund sponsored by the HKU Libraries.

### Reference

1. Cheung BHH, Lau GKK, Wong GTC, Lee EYP, Kulkarni D, Seow CS, et al. ChatGPT versus human in generating medical graduate exam multiple choice questions—A multinational prospective study (Hong Kong S.A.R., Singapore, Ireland, and the United Kingdom). PLoS One. 2023;18(8):e0290691. <https://doi.org/10.1371/journal.pone.0290691> PMID: [37643186](https://pubmed.ncbi.nlm.nih.gov/37643186/)

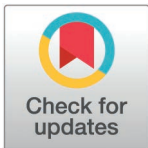

### OPEN ACCESS

**Citation:** Cheung BHH, Lau GKK, Wong GTC, Lee EYP, Kulkarni D, Seow CS, et al. (2025) Correction: ChatGPT versus human in generating medical graduate exam multiple choice questions—A multinational prospective study (Hong Kong S.A.R., Singapore, Ireland, and the United Kingdom). PLoS One 20(6): e0327290. <https://doi.org/10.1371/journal.pone.0327290>

**Published:** June 27, 2025

**Copyright:** © 2025 Cheung et al. This is an open access article distributed under the terms of the [Creative Commons Attribution License](https://creativecommons.org/licenses/by/4.0/), which permits unrestricted use, distribution, and reproduction in any medium, provided the original author and source are credited.
